# Supplementary material for: Fabrication of WS2/GaN p-n Junction by Wafer-Scale WS2 Thin Film Transfer
Source: PubMed Central journal article supplement (PMC5126671; doi:10.1038/srep37833), 2016-11-29
Supplement: srep37833-s1.pdf [file srep37833-s1.pdf]

## Supplementary Information

### Fabrication of WS<sub>2</sub>/GaN p-n Junction by Wafer-Scale WS<sub>2</sub> Thin Film Transfer

Yang Yu<sup>1</sup>, Patrick W. K. Fong<sup>1</sup>, Shifeng Wang<sup>1</sup>, and Charles Surya\*<sup>1</sup>

<sup>1</sup>Department of Electronic and Information Engineering

The Hong Kong Polytechnic University

Hong Kong, China

E-mail: charles.surya@polyu.edu.hk

Figure S1 shows the Raman spectrum of that the  $A_{1g}$  mode located at 421.8 cm<sup>-1</sup> represents an out-of-plane vibration for the S atoms whereas the  $E_{2g}^1$  mode located at 356.9 cm<sup>-1</sup> comprises the in-plane displacement of W and S atoms, and the second-order phonon mode is labeled as the 2LA.<sup>1-2</sup> The FWHM of  $A_{1g}$  mode for type A film is 4.03 cm<sup>-1</sup>, which is 52% wider than the FWHM of  $A_{1g}$  mode for type B film which is 2.65 cm<sup>-1</sup>. The Raman intensity ratio of  $I(E_{2g}^1)/I(A_{1g})$  for type B film is 0.617, which is reduced to 0.454 for type C film, as shown in Figure S2, implying the in-plane vibration is decreased compared to the out-of-plane vibration, which should be due to the sub-grain disorientation or smaller-sized crystallites of the WS<sub>2</sub> film grown on GaN substrate.

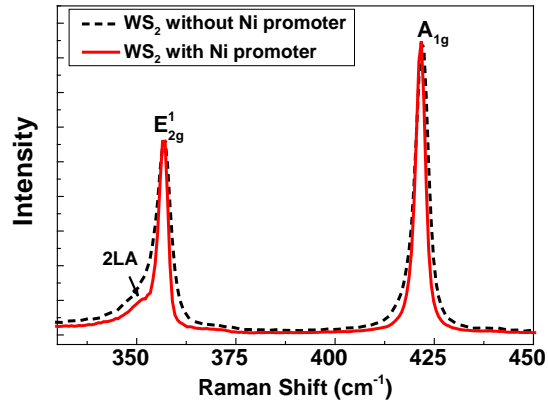

Figure S1. Raman spectrum of WS<sub>2</sub> grown without (black dash line) and with (red solid line) Ni promoter on sapphire substrate

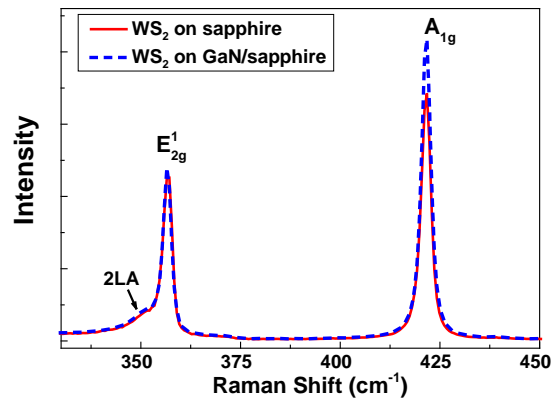

Figure S2. Raman spectrum of WS<sub>2</sub> grown on sapphire substrate (red solid line) and on GaN/sapphire substrate (blue dash line) with Ni promoter.

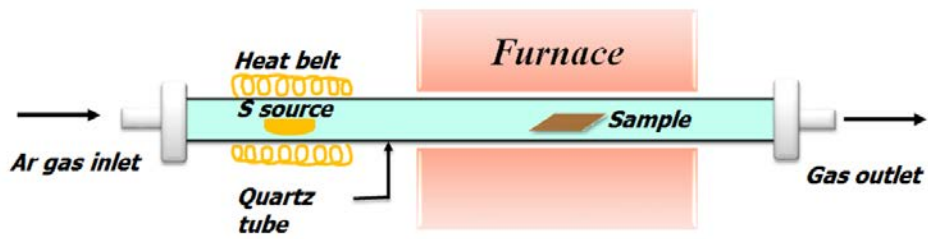

Figure S3. Schematic diagram of the experimental setup used for the growth of WS<sub>2</sub> thin films.

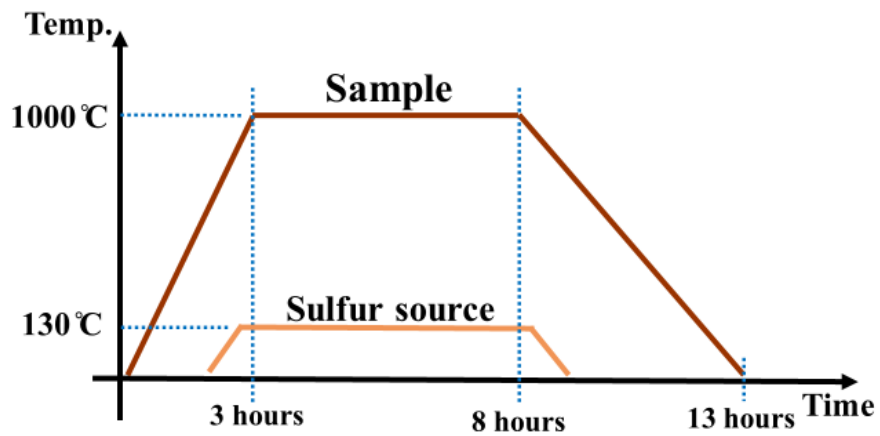

Figure S4. Temperature profile of the CVD process.

Figure S5 is the schematic diagram showing the etching-free wafer-scale transfer process for type II WS<sub>2</sub>. It is noted that type II WS<sub>2</sub>, with the vdW planes parallel to the substrate, is a key factor in the success of wafer-scale transfer. Type I WS<sub>2</sub>, with its vdW planes perpendicular to substrate, prevents the water molecules to penetrate evenly into the film-substrate interface.

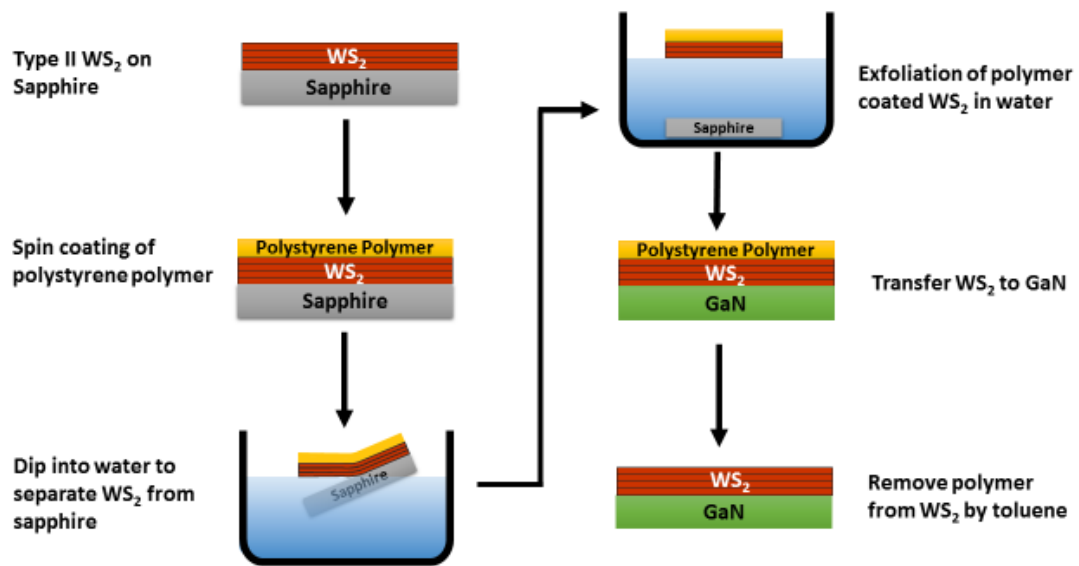

Figure S5. Schematic diagram of the etching-free transfer of type II WS<sub>2</sub>.

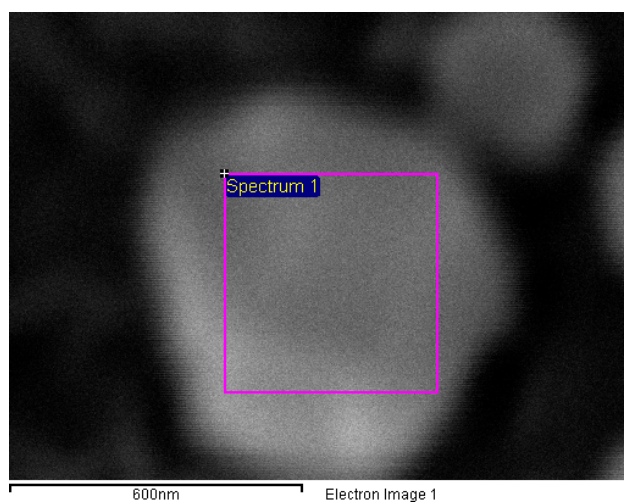

Figure S6. EDX analysis on a 500nm NiS<sub>x</sub> residue.

Table S1. Summary of the EDX analysis on a 500nm NiS<sub>x</sub> residue.

| Element | Weight% | Atomic% |
|---------|---------|---------|
| C K     | 11.79   | 38.69   |
| Al K    | 12.25   | 17.90   |
| S K     | 19.97   | 24.55   |
| Ni K    | 15.85   | 10.64   |
| W M     | 13.32   | 2.86    |
| Au M    | 26.82   | 5.37    |
| Totals  | 100.00  |         |

Reproducibility of turn-on voltage of the p-n junctions can be well controlled by our transfer fabrication method, and the oscillations the carrier mobility of WS<sub>2</sub> thin film were at an acceptable level. 3 group data of carrier mobility of WS<sub>2</sub> thin film at the same growth condition and turn-on voltage of 3 different kind of p-n junctions are listed in the Table S2 and Table S3.

Table S2. The carrier mobility of three groups of WS<sub>2</sub> thin films at the same growth condition.

| WS <sub>2</sub> thin film<br>with Ni promoter | Carrier mobility<br>[cm <sup>2</sup> /Vs] |
|-----------------------------------------------|-------------------------------------------|
| <i>1</i>                                      | <i>63.3</i>                               |
| <i>2</i>                                      | <i>58.7</i>                               |
| <i>3</i>                                      | <i>60.1</i>                               |

Table S3. The leakage current and turn-on voltage of three groups of back-transferred, top-transferred and as-grown p-n junctions.

| Back-transferred<br>p-n junction | Leakage current<br>[mA/cm <sup>2</sup> ] | Turn-on voltage<br>[V] |
|----------------------------------|------------------------------------------|------------------------|
| 1                                | 1.15                                     | 0.50V                  |
| 2                                | 2.88                                     | 0.45V                  |
| 3                                | 3.75                                     | 0.51V                  |
| Top-transferred<br>p-n junction  | Leakage current<br>[mA/cm <sup>2</sup> ] | Turn-on voltage<br>[V] |
| 1                                | 0.0296                                   | 1.20V                  |
| 2                                | 0.0971                                   | 1.07V                  |
| 3                                | 0.0187                                   | 1.22V                  |
| As-grown<br>p-n junction         | Leakage current<br>[mA/cm <sup>2</sup> ] | Turn-on voltage<br>[V] |
| 1                                | 92.4                                     | 0.17V                  |
| 2                                | 80.6                                     | 0.16V                  |
| 3                                | 73.8                                     | 0.17V                  |

## References

1. Zhao, W. J. *et al.* Lattice dynamics in mono- and few-layer sheets of WS<sub>2</sub> and WSe<sub>2</sub>. *Nanoscale* **5**, 9677-9683 (2013).
2. Sourisseau, C., Cruege, F., Fouassier, M. & Alba, M. Second-order Raman effects, inelastic neutron scattering and lattice dynamics in 2H-WS<sub>2</sub>. *Chem. Phys.* **150**, 281-293 (1991).
